# Supplementary material for: The round goby genome provides insights into mechanisms that may facilitate biological invasions
Source: PubMed Central journal article supplement (PMC6988351; doi:10.1186/s12915-019-0731-8), 2020-01-28
Supplement: 12915_2019_731_MOESM3_ESM.pdf [file 12915_2019_731_MOESM3_ESM.pdf]

Supplemental\_Fig\_S2  
The round goby genome

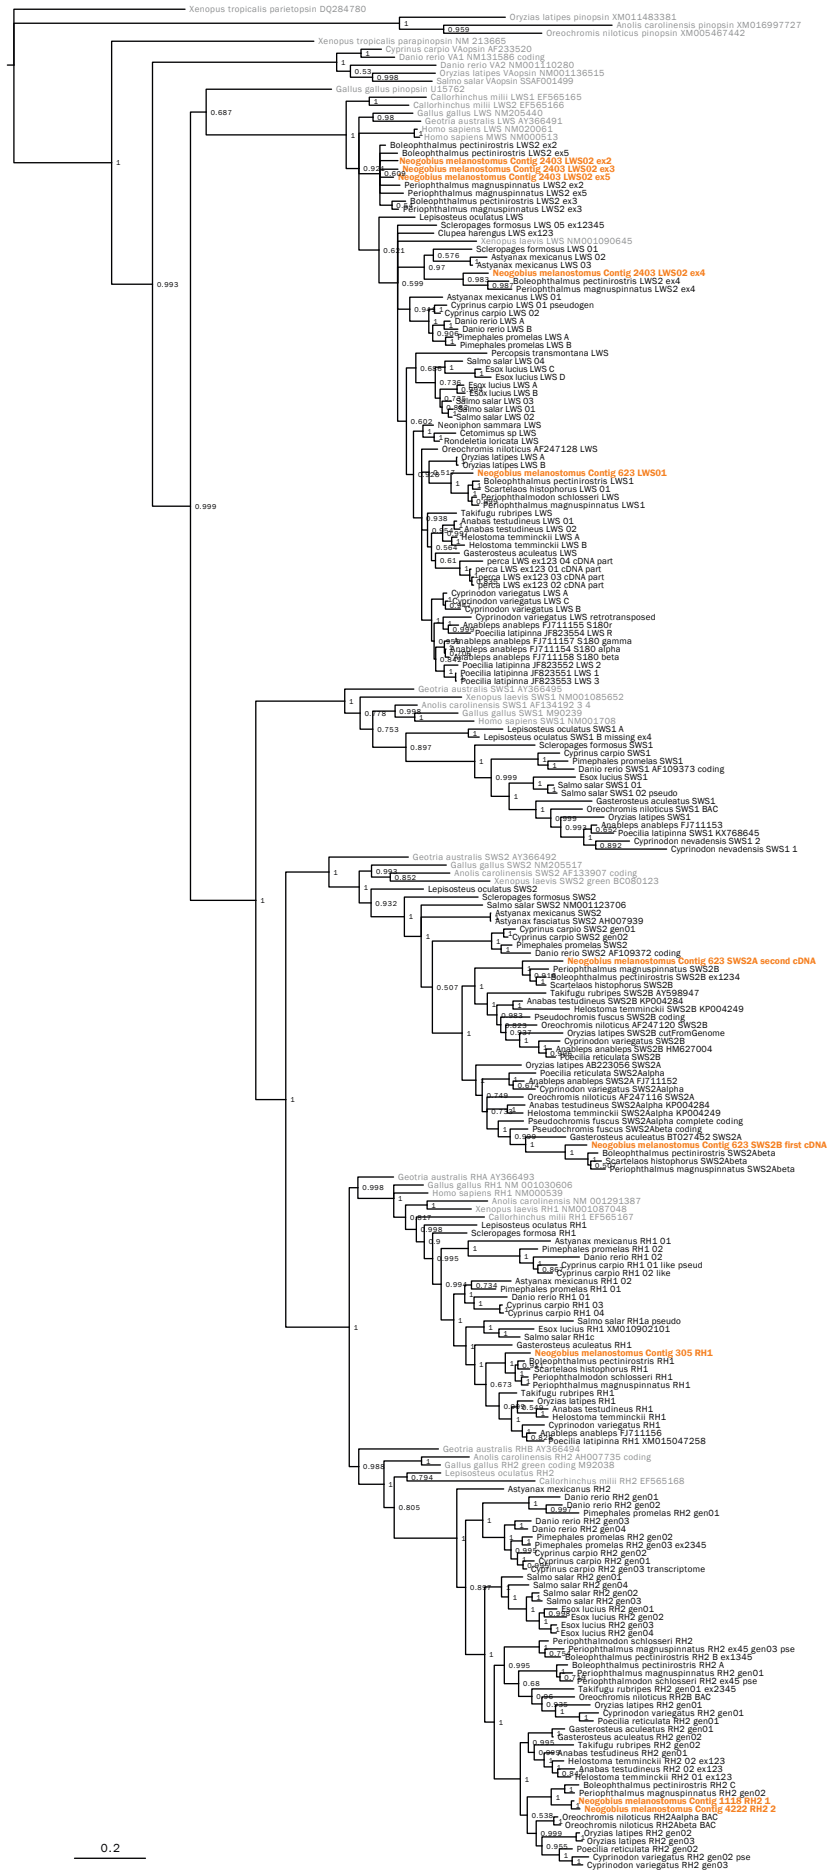

VA opsins and pinopsin  
(outgroup)

LWS (red)

SWS1 (UV)

SWS2 (violet/blue)

RH1 (dim vision)

RH2 (green)

Phylogenetic tree of vertebrate opsin protein sequences, using single exons. Maximum-likelihood phylogenetic tree with VA opsins and pinopsins as outgroup. Round goby is indicated in orange. Non-teleost species and the outgroup (VA opsins and pinopsins) are indicated in grey.
