# Supplementary material for: The round goby genome provides insights into mechanisms that may facilitate biological invasions
Source: PubMed Central journal article supplement (PMC6988351; doi:10.1186/s12915-019-0731-8), 2020-01-28

Maximum-likelihood phylogenetic tree of percomorph olfactory receptor protein sequences.

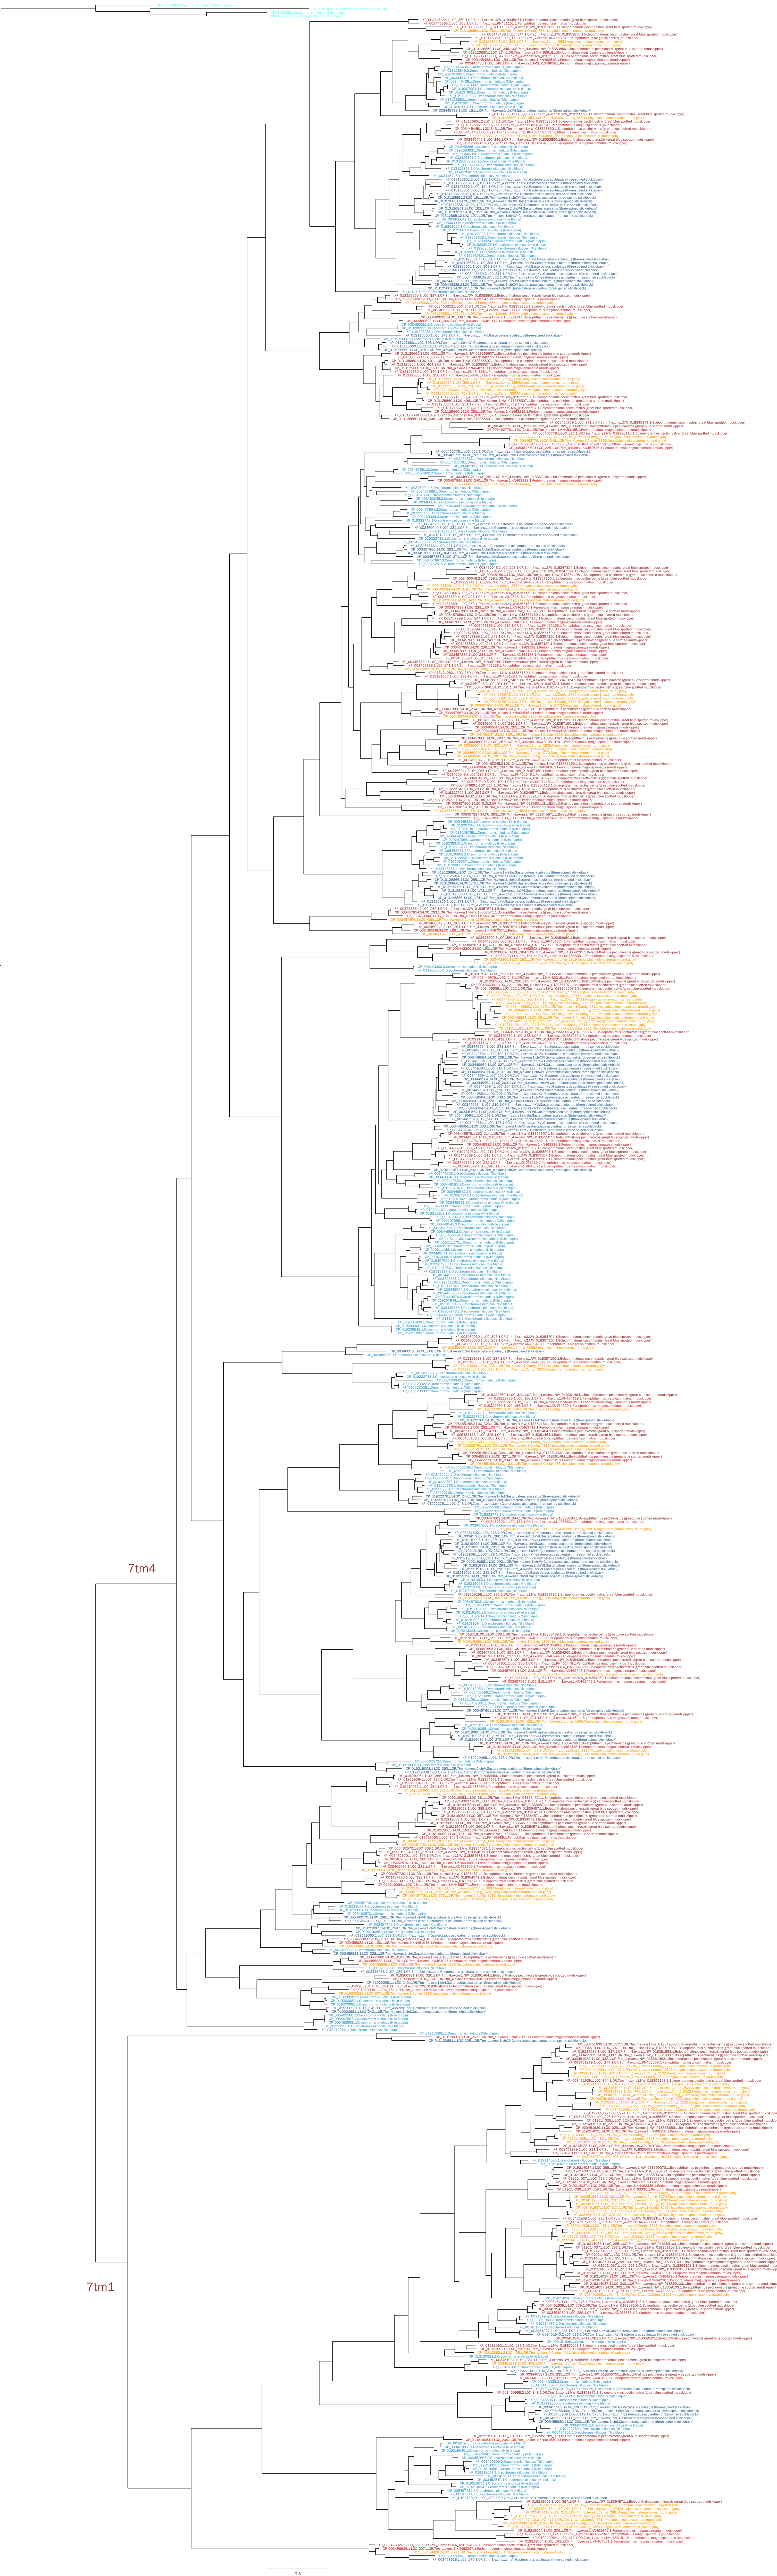

Supplement: 12915_2019_731_MOESM4_ESM.pdf [file 12915_2019_731_MOESM4_ESM.pdf]
