# Supplementary material for: The round goby genome provides insights into mechanisms that may facilitate biological invasions
Source: PubMed Central journal article supplement (PMC6988351; doi:10.1186/s12915-019-0731-8), 2020-01-28
Supplement: 12915_2019_731_MOESM9_ESM.pdf [file 12915_2019_731_MOESM9_ESM.pdf]

### MIPS

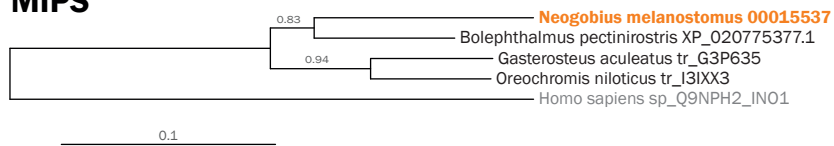

### IMPA

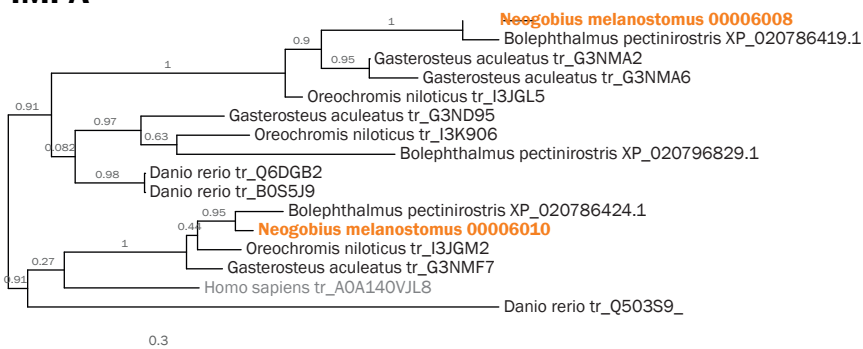

### SMIT

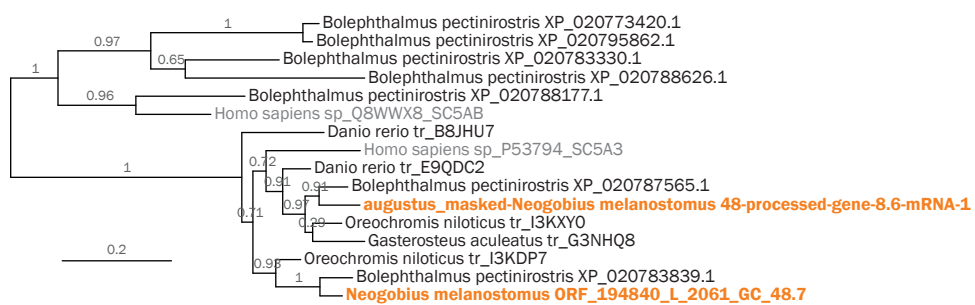

Phylogenetic tree of vertebrate genes promoting osmolyte production. Maximum-likelihood tree with 100 bootstraps of round goby (*Neogobius melanostomus*, orange) in relation to great blue-spotted mudskipper (*Bolephthalmus pectinirostris*), stickleback (*Gasterosteus aculeatus*), Nile tilapia (*Oreochromis niloticus*), zebrafish (*Danio rerio*), and human (*Homo sapiens*, grey)
