# Supplementary material for: The round goby genome provides insights into mechanisms that may facilitate biological invasions
Source: PubMed Central journal article supplement (PMC6988351; doi:10.1186/s12915-019-0731-8), 2020-01-28
Supplement: 12915_2019_731_MOESM14_ESM.pdf [file 12915_2019_731_MOESM14_ESM.pdf]

Supplemental\_Fig\_S8  
The round goby genome

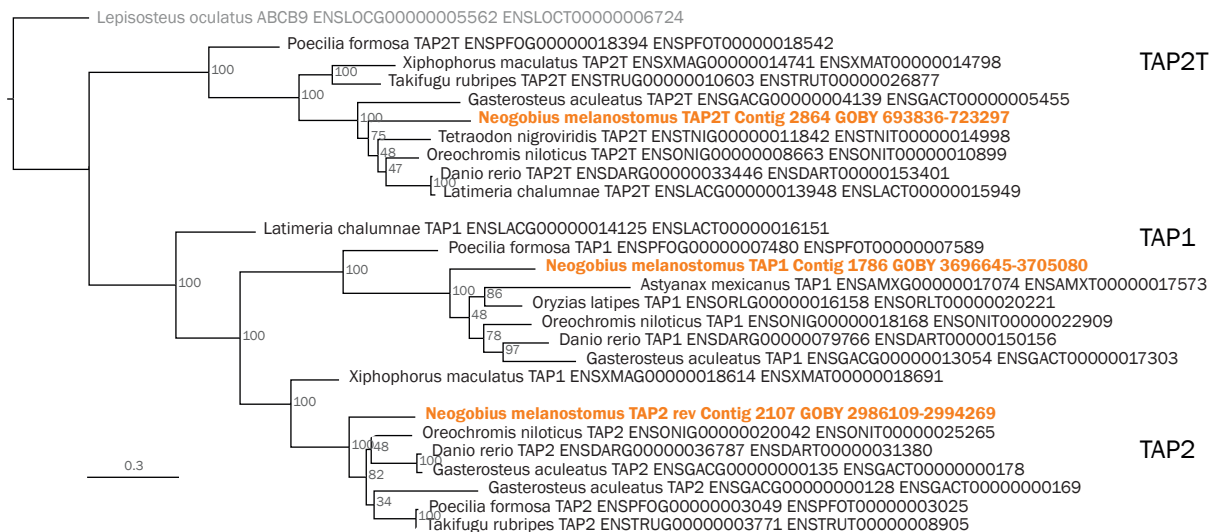

Phylogenetic tree of fish TAP genes. Maximum-likelihood tree with 500 bootstraps. Round goby (*Neogobius melanostomus*) is labeled orange. Outgroup: *Lepisosteus oculatus* ABC transporter.
