# Supplementary material for: The round goby genome provides insights into mechanisms that may facilitate biological invasions
Source: PubMed Central journal article supplement (PMC6988351; doi:10.1186/s12915-019-0731-8), 2020-01-28
Supplement: 12915_2019_731_MOESM18_ESM.pdf [file 12915_2019_731_MOESM18_ESM.pdf]

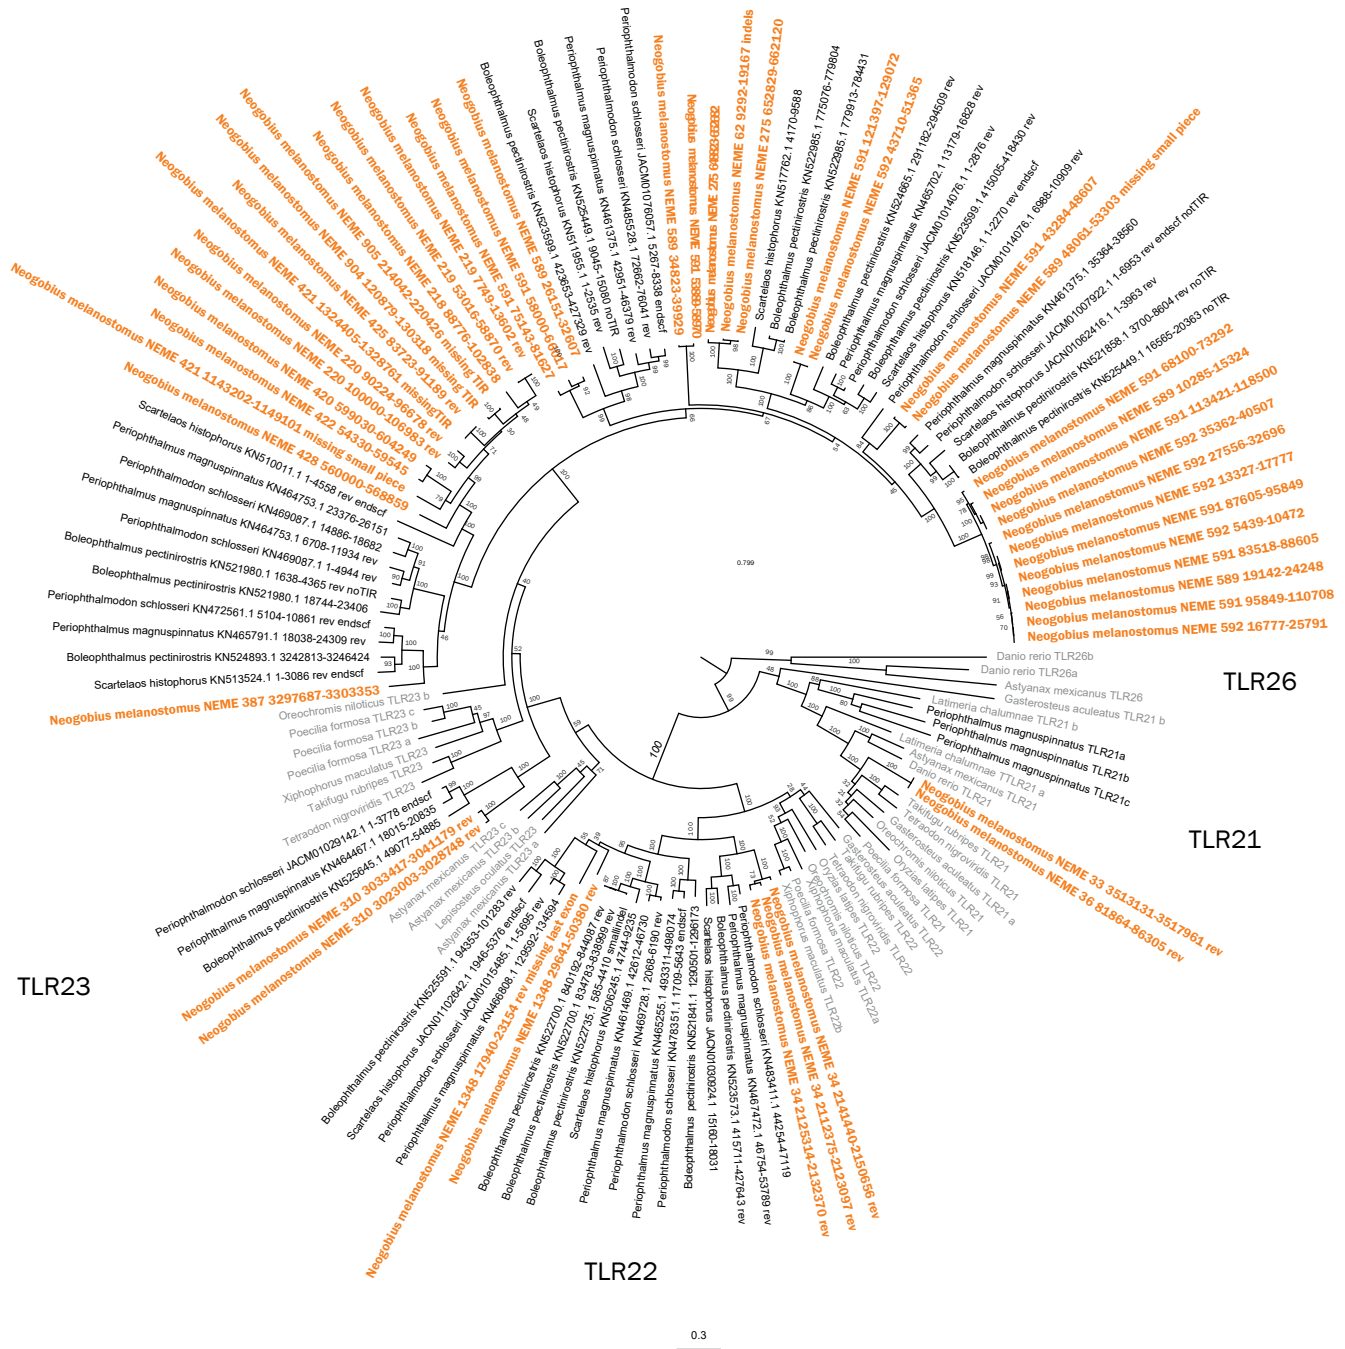

Phylogenetic tree of Gobiidae Toll Like Receptor protein sequences. A maximum likelihood phylogenetic tree run with the JTT substitution model and 500 bootstrap replicates on the transmembrane, linker and TIR domain of all TLRs found in Gobiiformes (*Neogobius melanostomus*, orange; other Gobiidae, black) and selected other fish (grey) for context.
