# Supplementary material for: The round goby genome provides insights into mechanisms that may facilitate biological invasions
Source: BMC Biol. 2020 Jan 28;18:11. doi: 10.1186/s12915-019-0731-8 (PMC6988351; doi:10.1186/s12915-019-0731-8)
Supplement: Supplementary file 20 — Figure S12. Phylogenetic trees of SUZ12, EED, and RBBP4. [file 12915_2019_731_MOESM20_ESM.pdf]

Supplemental\_Fig\_S12  
The round goby genome

EED

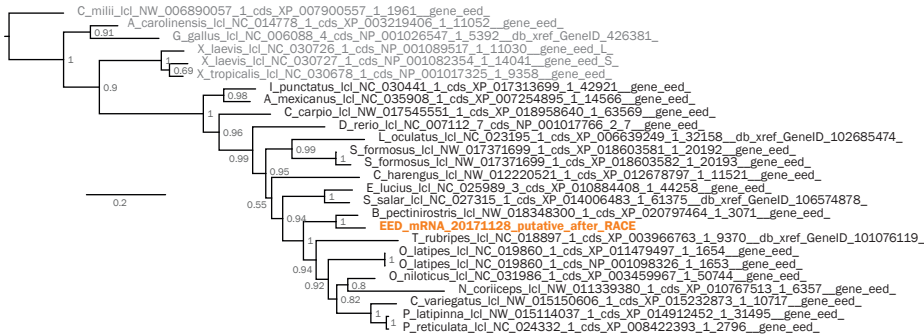

SUZ12

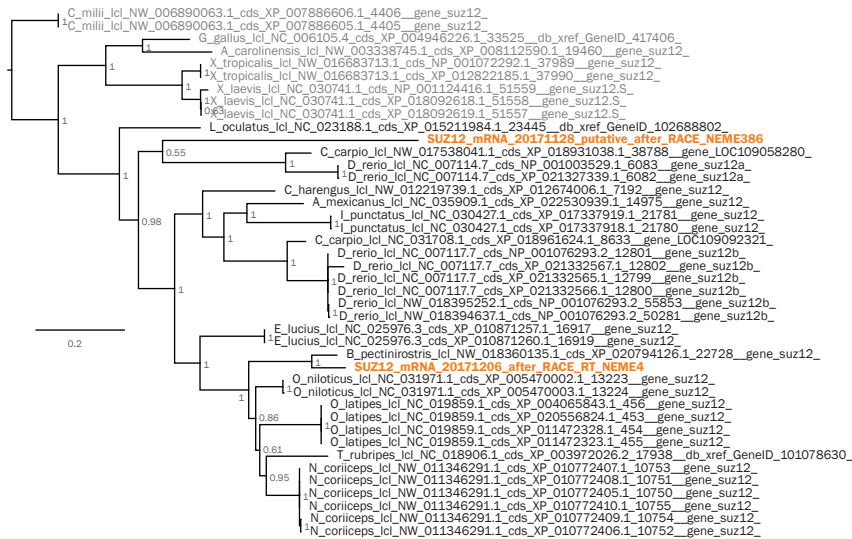

RBBP4

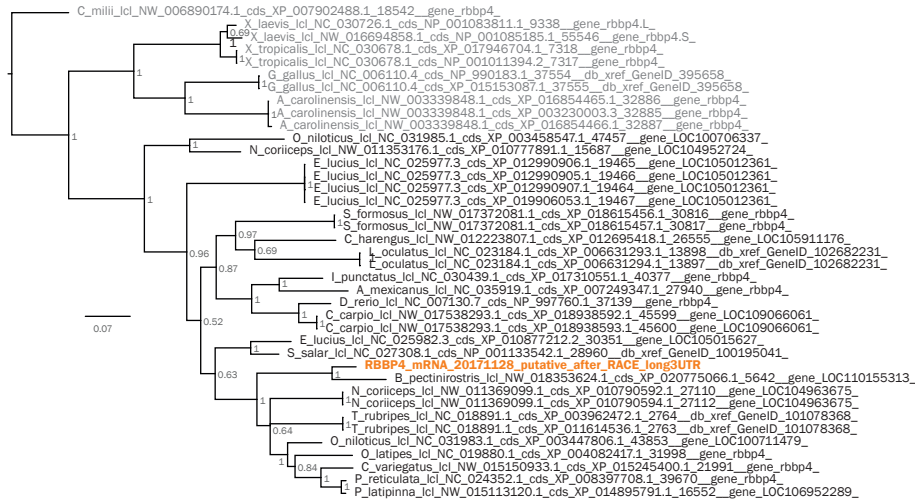

Phylogenetic tree of vertebrate PRC2 components EED, SUZ12, and RBBP4. Bayesian phylogenetic tree rooted with Australian ghostshark (*C. milii*). Round goby is indicated in orange.
